# Supplementary material for: DNA-Based Authentication and Metabolomics Analysis of Medicinal Plants Samples by DNA Barcoding and Ultra-High-Performance Liquid Chromatography/Triple Quadrupole Mass Spectrometry (UHPLC-MS)
Source: MDPI journal article supplement (doi:10.3390/plants9111601), 2020-11-18
Supplement: s1 [file s1]

# IDENTIFICATION ENGINE: RESULTS

Results Summary 

| Query ID           | Best ID                  | Search DB |
|--------------------|--------------------------|-----------|
| unlabeled_sequence | <i>Camellia sinensis</i> | MATK_RBCL |

Query: unlabeled\_sequence  
Top Hit: Ericales - *Camellia sinensis*

## Score Summary

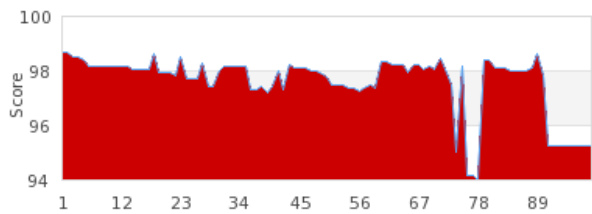

Scores indicate the degree of similarity between the query sequence and hits. Higher is better.

## E-Value Summary

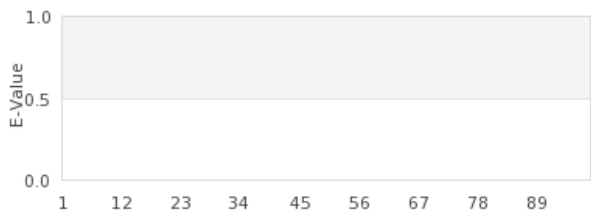

E-Values are an indicator of the likelihood that a given match was generated randomly. Lower is better.



# IDENTIFICATION ENGINE: RESULTS

## Results Summary

| Query ID           | Best ID                       | Search DB |
|--------------------|-------------------------------|-----------|
| unlabeled_sequence | <i>Blepharocalyx tweediei</i> | MATK_RBCL |

**Query:** unlabeled\_sequence  
**Top Hit:** Myrtales - *Blepharocalyx tweediei*

### Score Summary

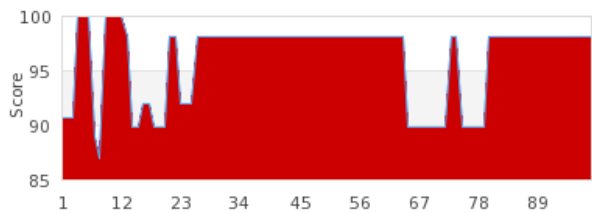

Scores indicate the degree of similarity between the query sequence and hits. Higher is better.

### E-Value Summary

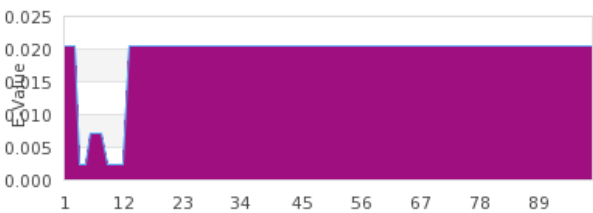

E-Values are an indicator of the likelihood that a given match was generated randomly. Lower is better.



# IDENTIFICATION ENGINE: RESULTS

Results Summary 

| Query ID           | Best ID                  | Search DB |
|--------------------|--------------------------|-----------|
| unlabeled_sequence | <i>Camellia sinensis</i> | MATK_RBCL |

Query: unlabeled\_sequence  
Top Hit: Ericales - *Camellia sinensis*

## Score Summary

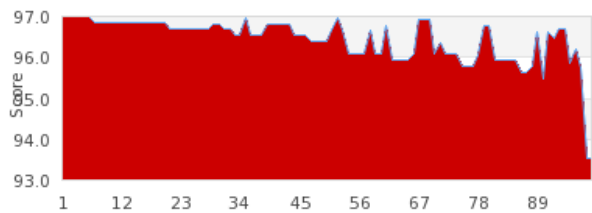

Scores indicate the degree of similarity between the query sequence and hits. Higher is better.

## E-Value Summary

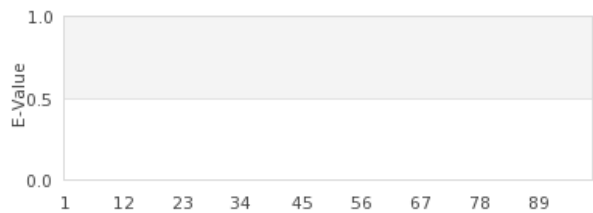

E-Values are an indicator of the likelihood that a given match was generated randomly. Lower is better.
