# Supplementary material for: DNA-Based Authentication and Metabolomics Analysis of Medicinal Plants Samples by DNA Barcoding and Ultra-High-Performance Liquid Chromatography/Triple Quadrupole Mass Spectrometry (UHPLC-MS)
Source: MDPI journal article supplement (doi:10.3390/plants9111601), 2020-11-18
Supplement: s1 [file s1]

# IDENTIFICATION ENGINE: RESULTS

Results Summary 

| Query ID           | Best ID              | Search DB |
|--------------------|----------------------|-----------|
| unlabeled_sequence | <i>Tilia cordata</i> | MATK_RBCL |

Query: unlabeled\_sequence  
Top Hit: Malvales - *Tilia cordata*

## Score Summary

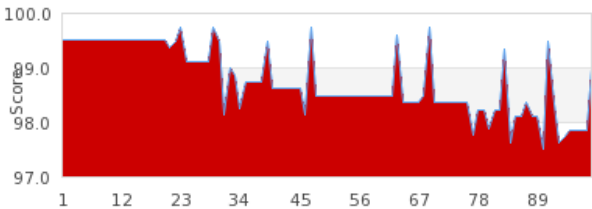

Scores indicate the degree of similarity between the query sequence and hits. Higher is better.

## E-Value Summary

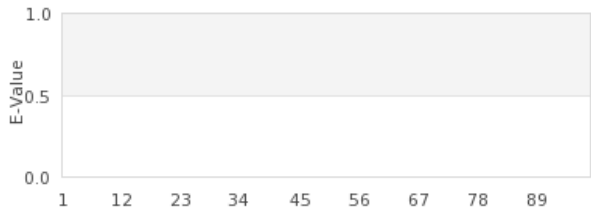

E-Values are an indicator of the likelihood that a given match was generated randomly. Lower is better.

# IDENTIFICATION ENGINE: RESULTS

Results Summary 

| Query ID           | Best ID              | Search DB |
|--------------------|----------------------|-----------|
| unlabeled_sequence | <i>Tilia cordata</i> | MATK_RBCL |

Query: unlabeled\_sequence  
Top Hit: Malvales - *Tilia cordata*

## Score Summary

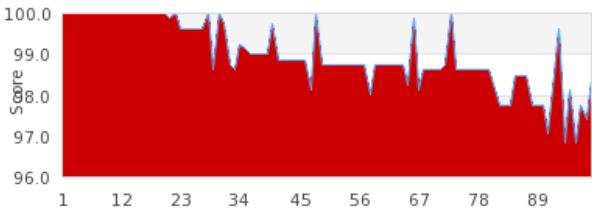

Scores indicate the degree of similarity between the query sequence and hits. Higher is better.

## E-Value Summary



E-Values are an indicator of the likelihood that a given match was generated randomly. Lower is better.

# IDENTIFICATION ENGINE: RESULTS

Results Summary 

| Query ID           | Best ID              | Search DB |
|--------------------|----------------------|-----------|
| unlabeled_sequence | <i>Tilia cordata</i> | MATK_RBCL |

Query: unlabeled\_sequence  
Top Hit: Malvales - *Tilia cordata*

## Score Summary

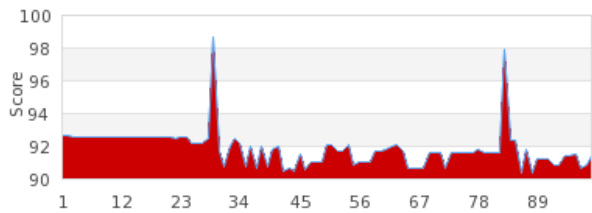

Scores indicate the degree of similarity between the query sequence and hits. Higher is better.

## E-Value Summary

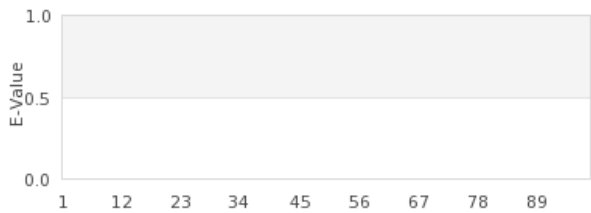

E-Values are an indicator of the likelihood that a given match was generated randomly. Lower is better.

# IDENTIFICATION ENGINE: RESULTS

Results Summary 

| Query ID           | Best ID  | Search DB |
|--------------------|----------|-----------|
| unlabeled_sequence | Malvales | MATK_RBCL |

Query: unlabeled\_sequence  
Top Hit: Malvales

## Score Summary

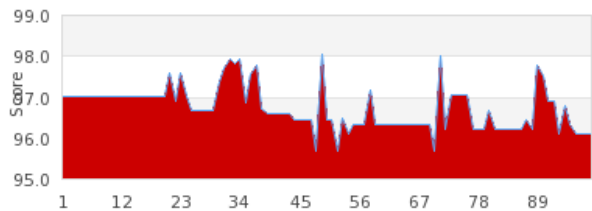

Scores indicate the degree of similarity between the query sequence and hits. Higher is better.

## E-Value Summary

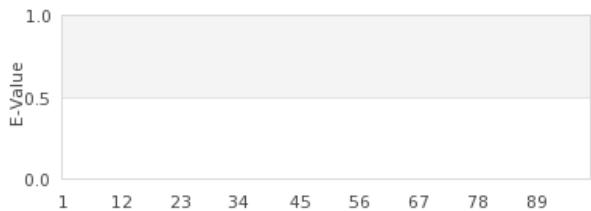

E-Values are an indicator of the likelihood that a given match was generated randomly. Lower is better.
