# Supplementary figures and images for: DNA-Based Authentication and Metabolomics Analysis of Medicinal Plants Samples by DNA Barcoding and Ultra-High-Performance Liquid Chromatography/Triple Quadrupole Mass Spectrometry (UHPLC-MS)
Source: MDPI journal article supplement (doi:10.3390/plants9111601), 2020-11-18

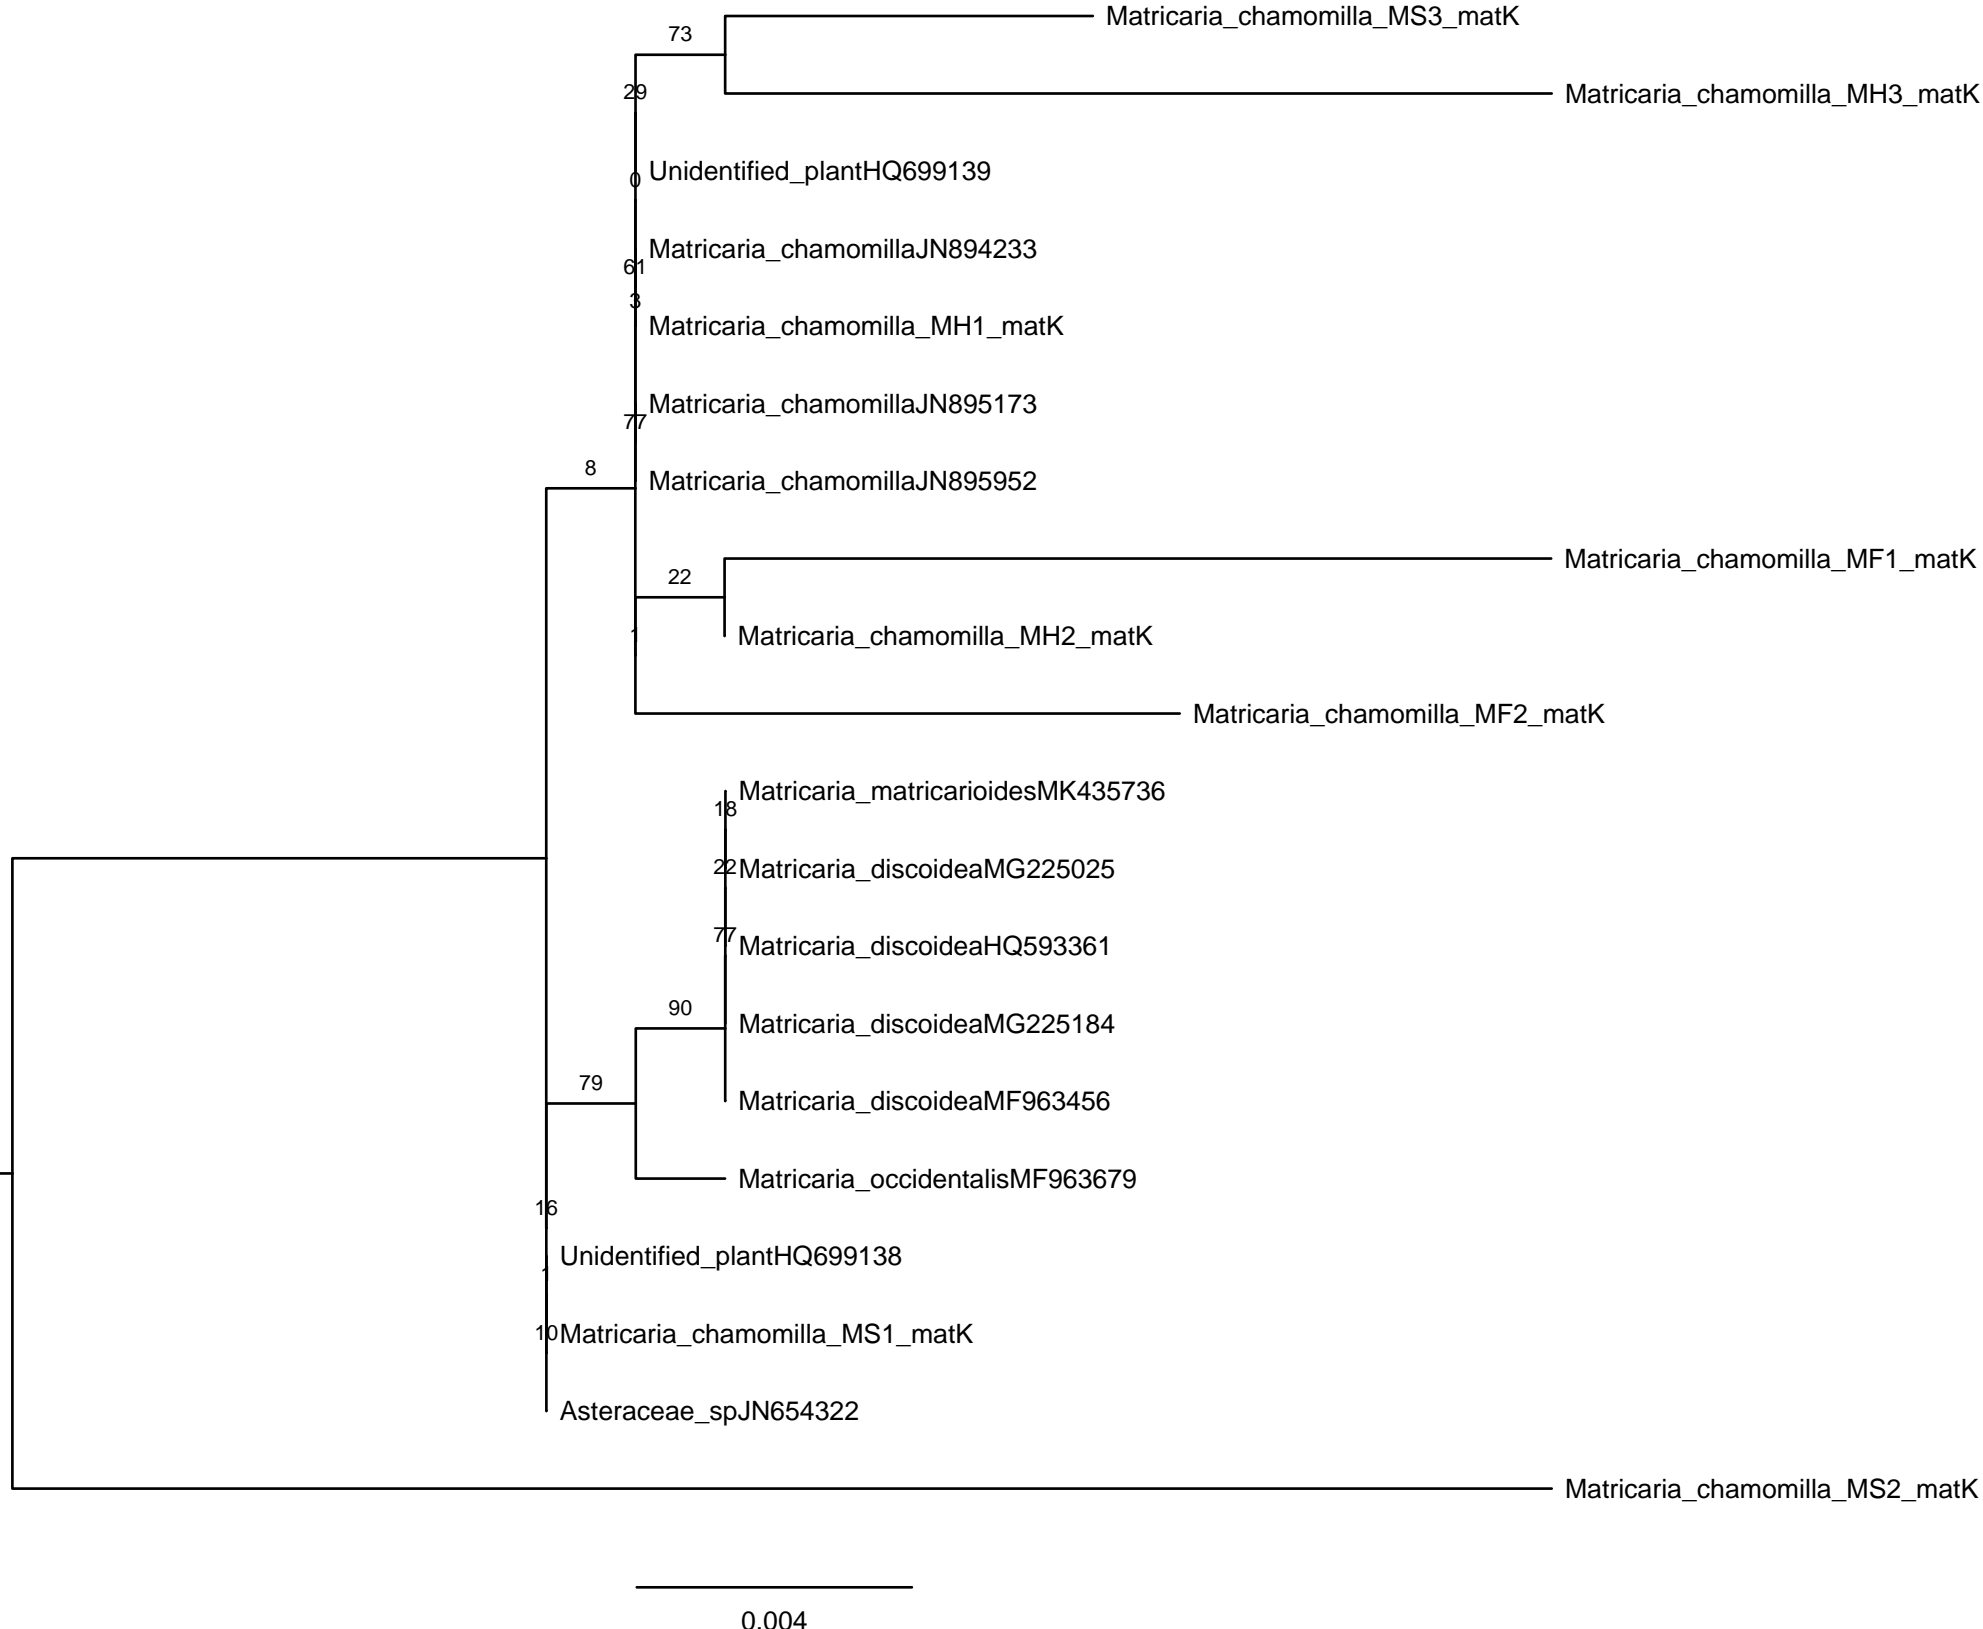

Supplement: s1 [file s1]

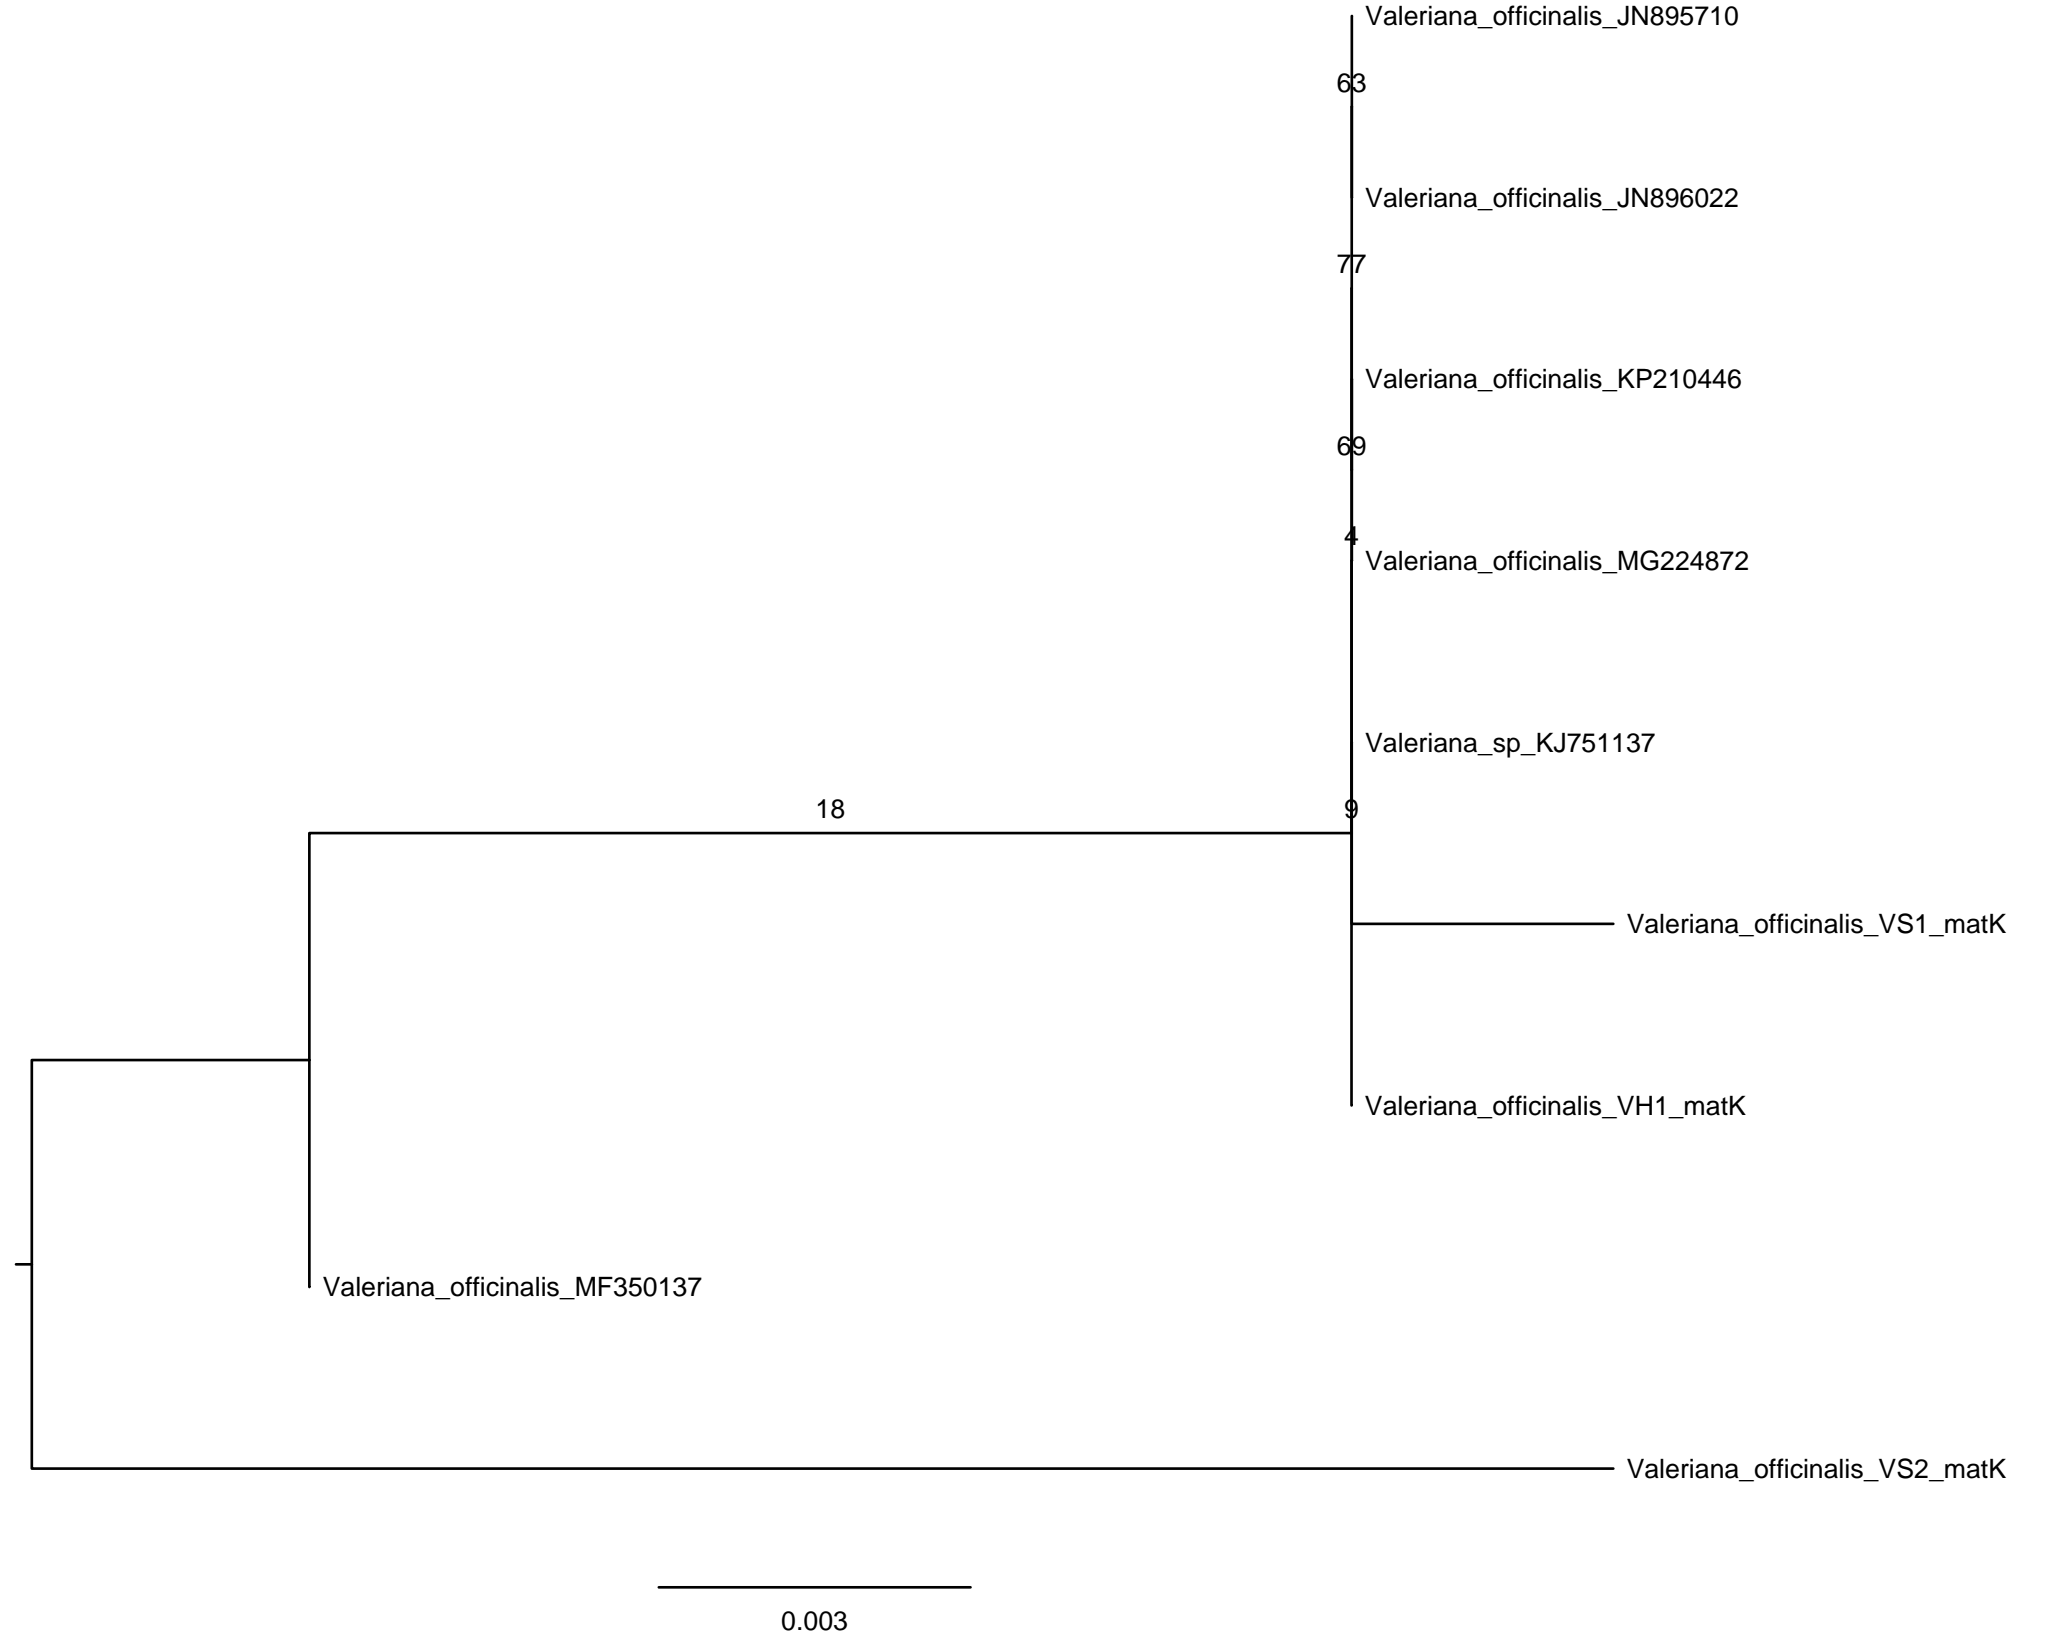

Supplement: s1 [file s1]

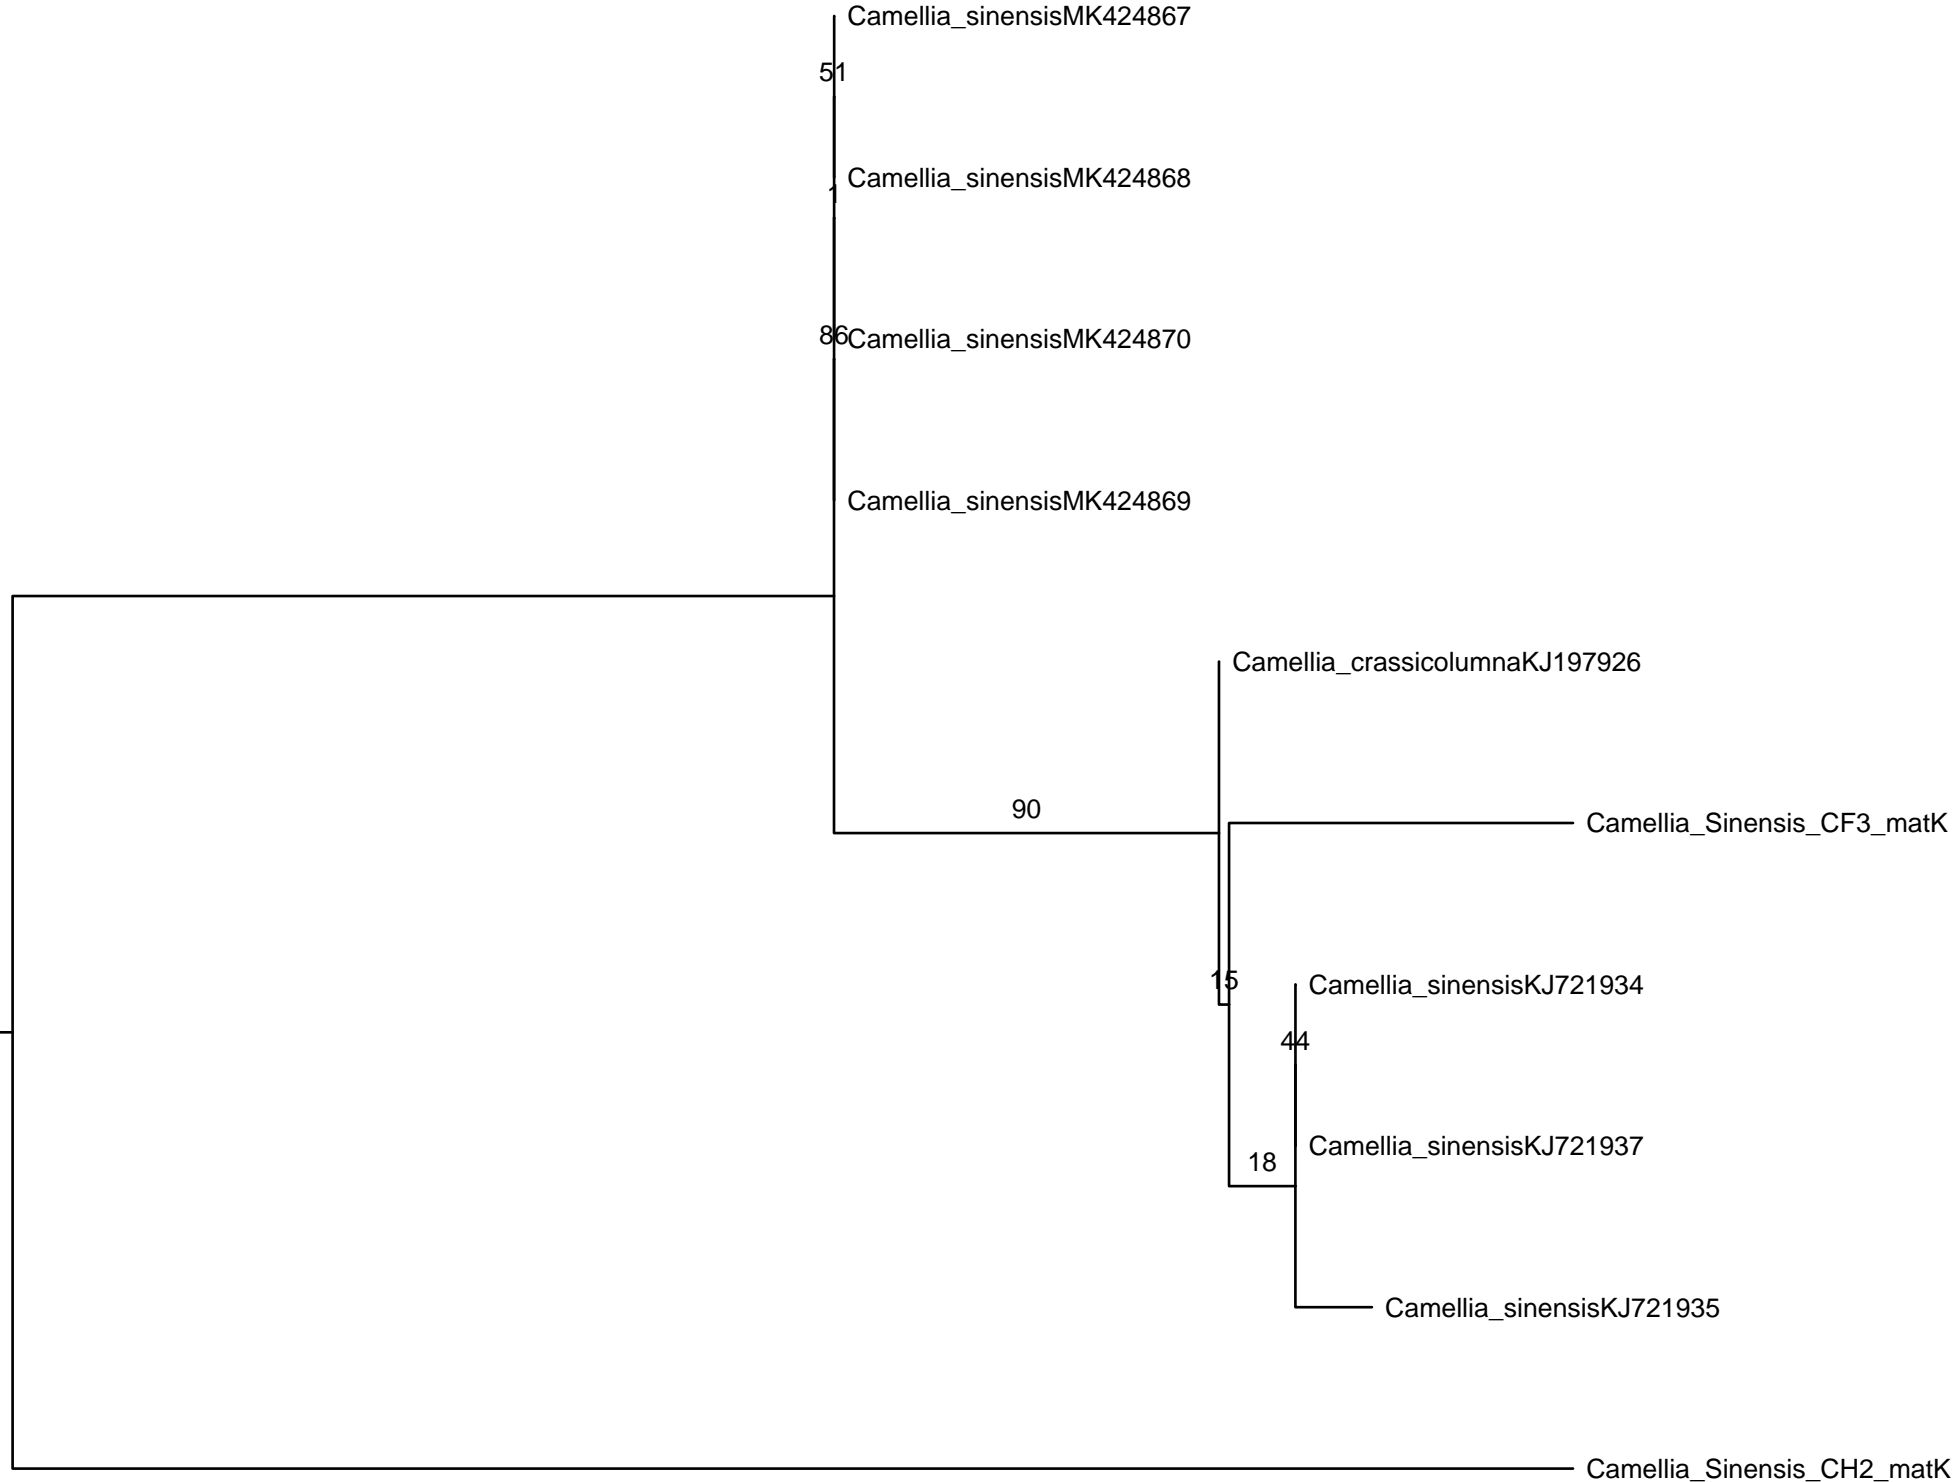

0.006

Supplement: s1 [file s1]

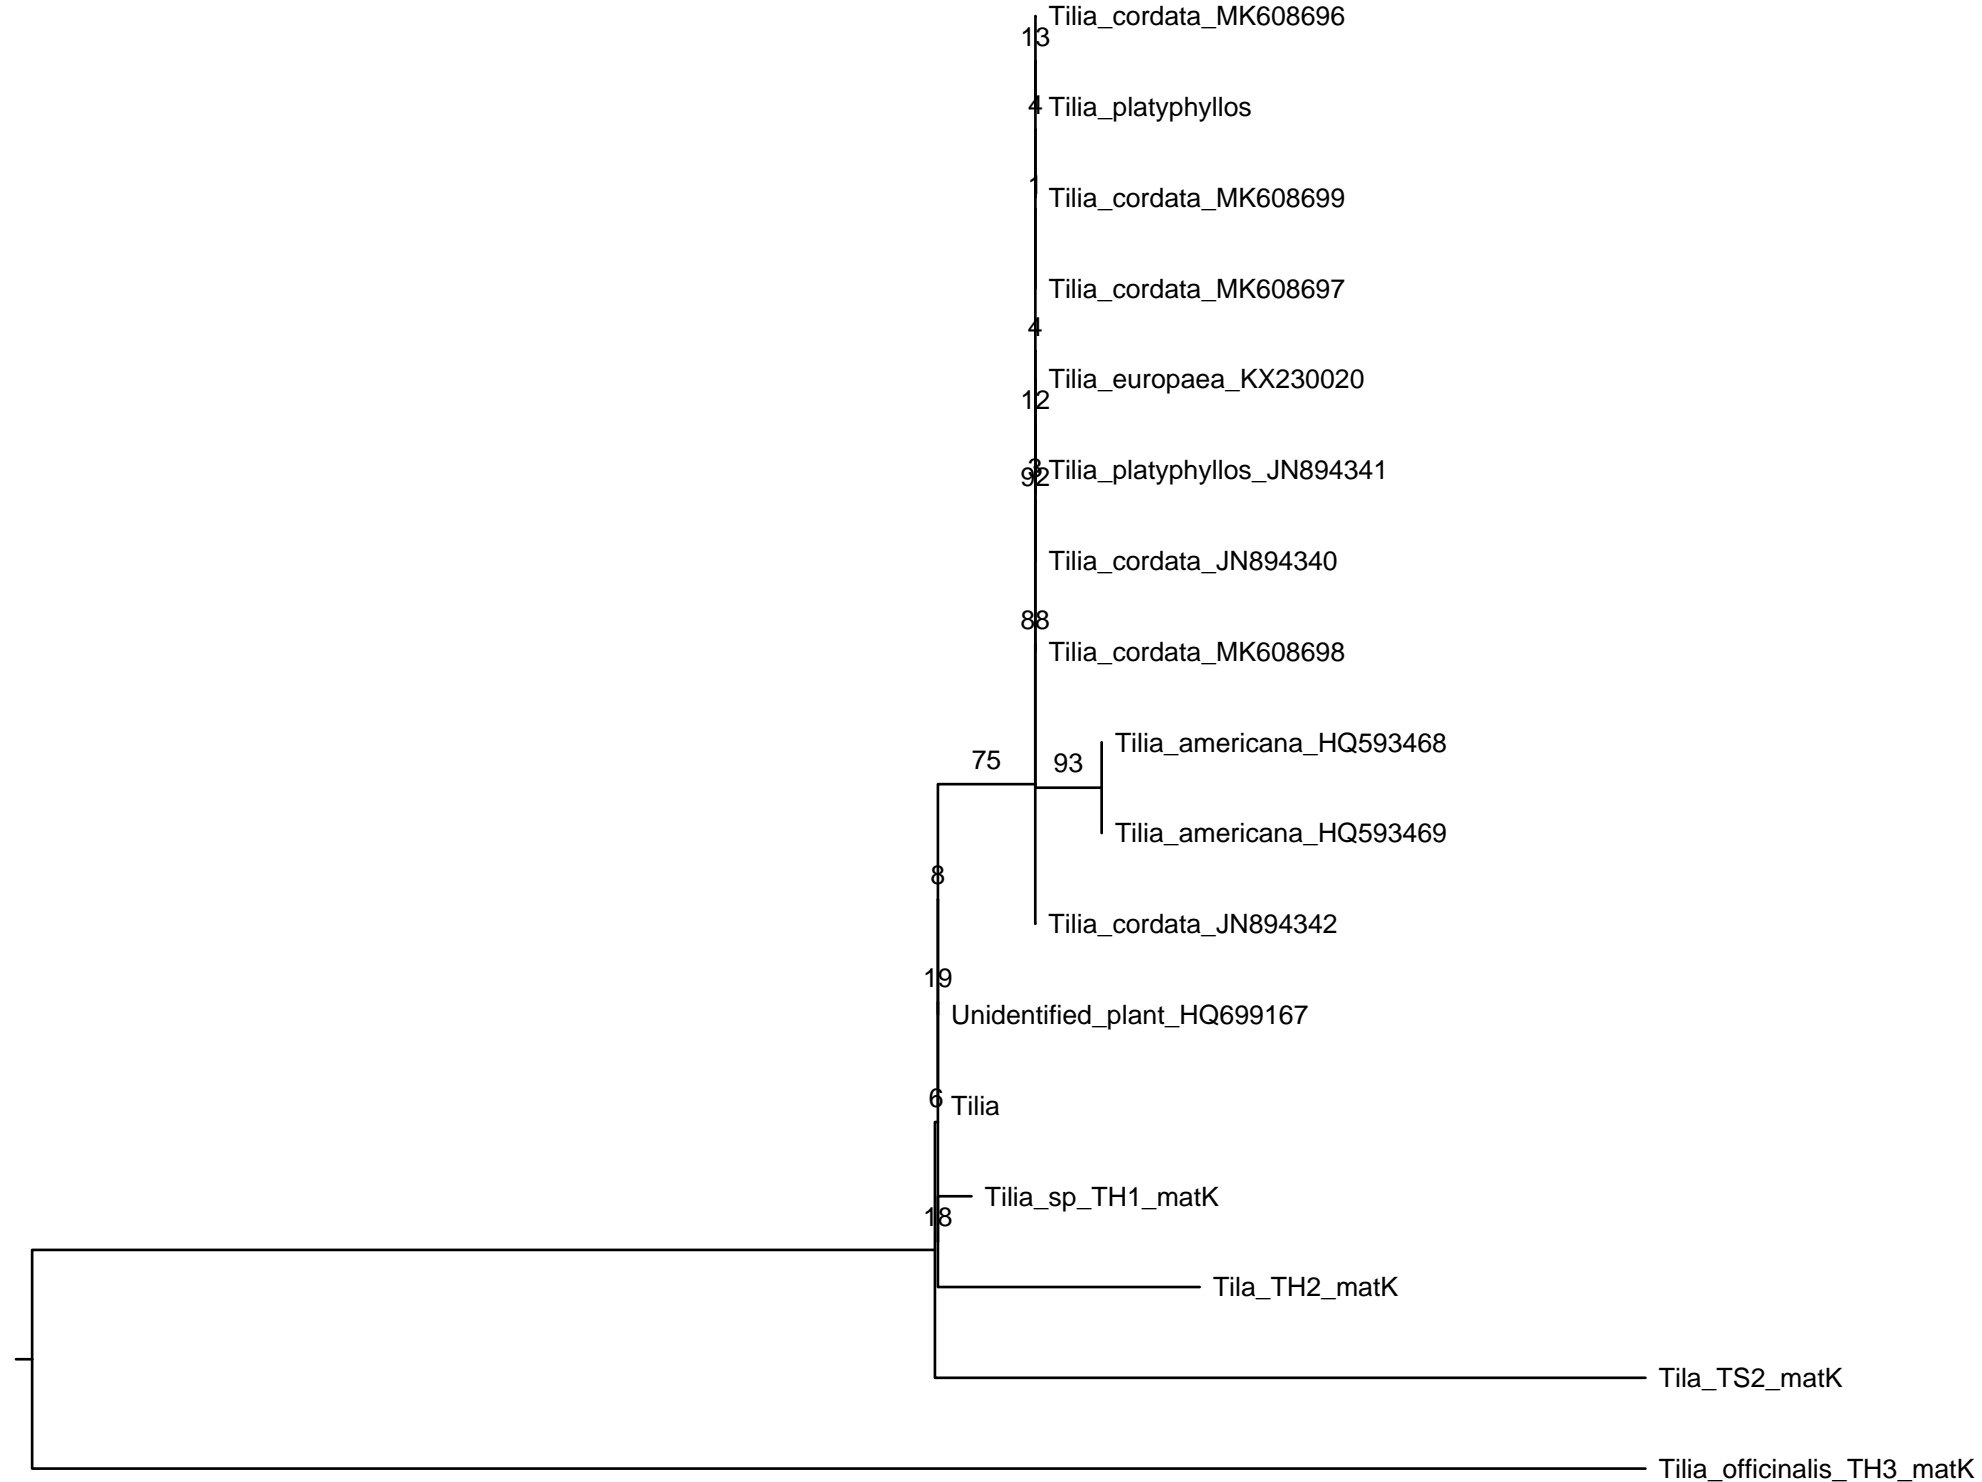

0.01

Supplement: s1 [file s1]
